# Supplementary material for: Differential Effects of Two Isocaloric Healthy Diets on Postprandial Lipid Responses in Individuals with Type 2 Diabetes
Source: MDPI journal article supplement (doi:10.3390/nu16030333), 2024-01-23

**Supplementary Figure 2.** Plasma glucose and insulin responses to a test meal evaluated as increase/decrease from fasting values (Panel A and C) and iAUC (Panel B and D) at baseline and after 8 weeks of dietary intervention with the MUFA (red lines and white bars) (n=22) or multifactorial diet (blue lines and bars) (n=21). Data are mean  $\pm$  SEM. \*p <0.05 Multifactorial vs. MUFA diet, unpaired t-test; §p <0.05 Multifactorial vs. MUFA, 8-week values adjusted for baseline by ANCOVA.

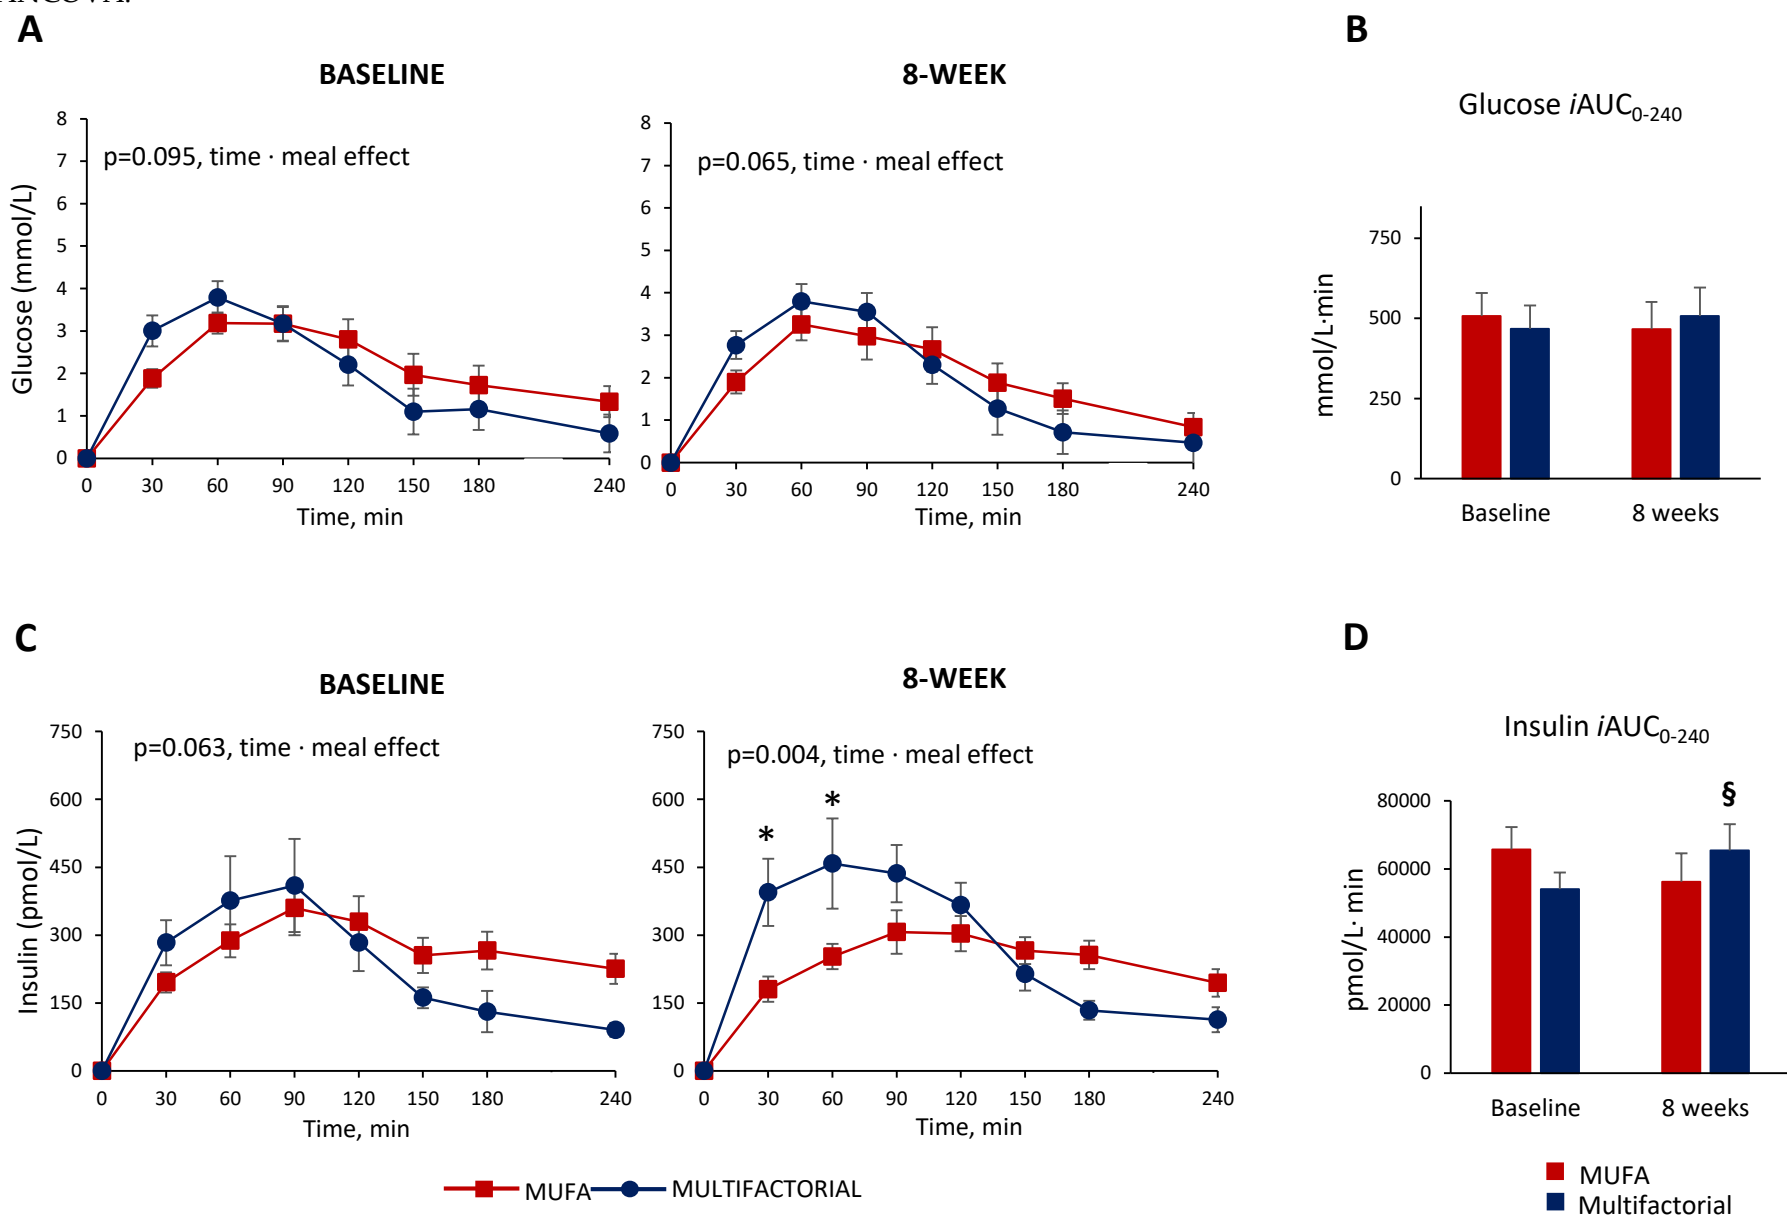

Supplement: s1 [file s1]
