# Supplementary figures and images for: Differential Effects of Two Isocaloric Healthy Diets on Postprandial Lipid Responses in Individuals with Type 2 Diabetes
Source: MDPI journal article supplement (doi:10.3390/nu16030333), 2024-01-23

Supplementary Figure 1. Flow Diagram

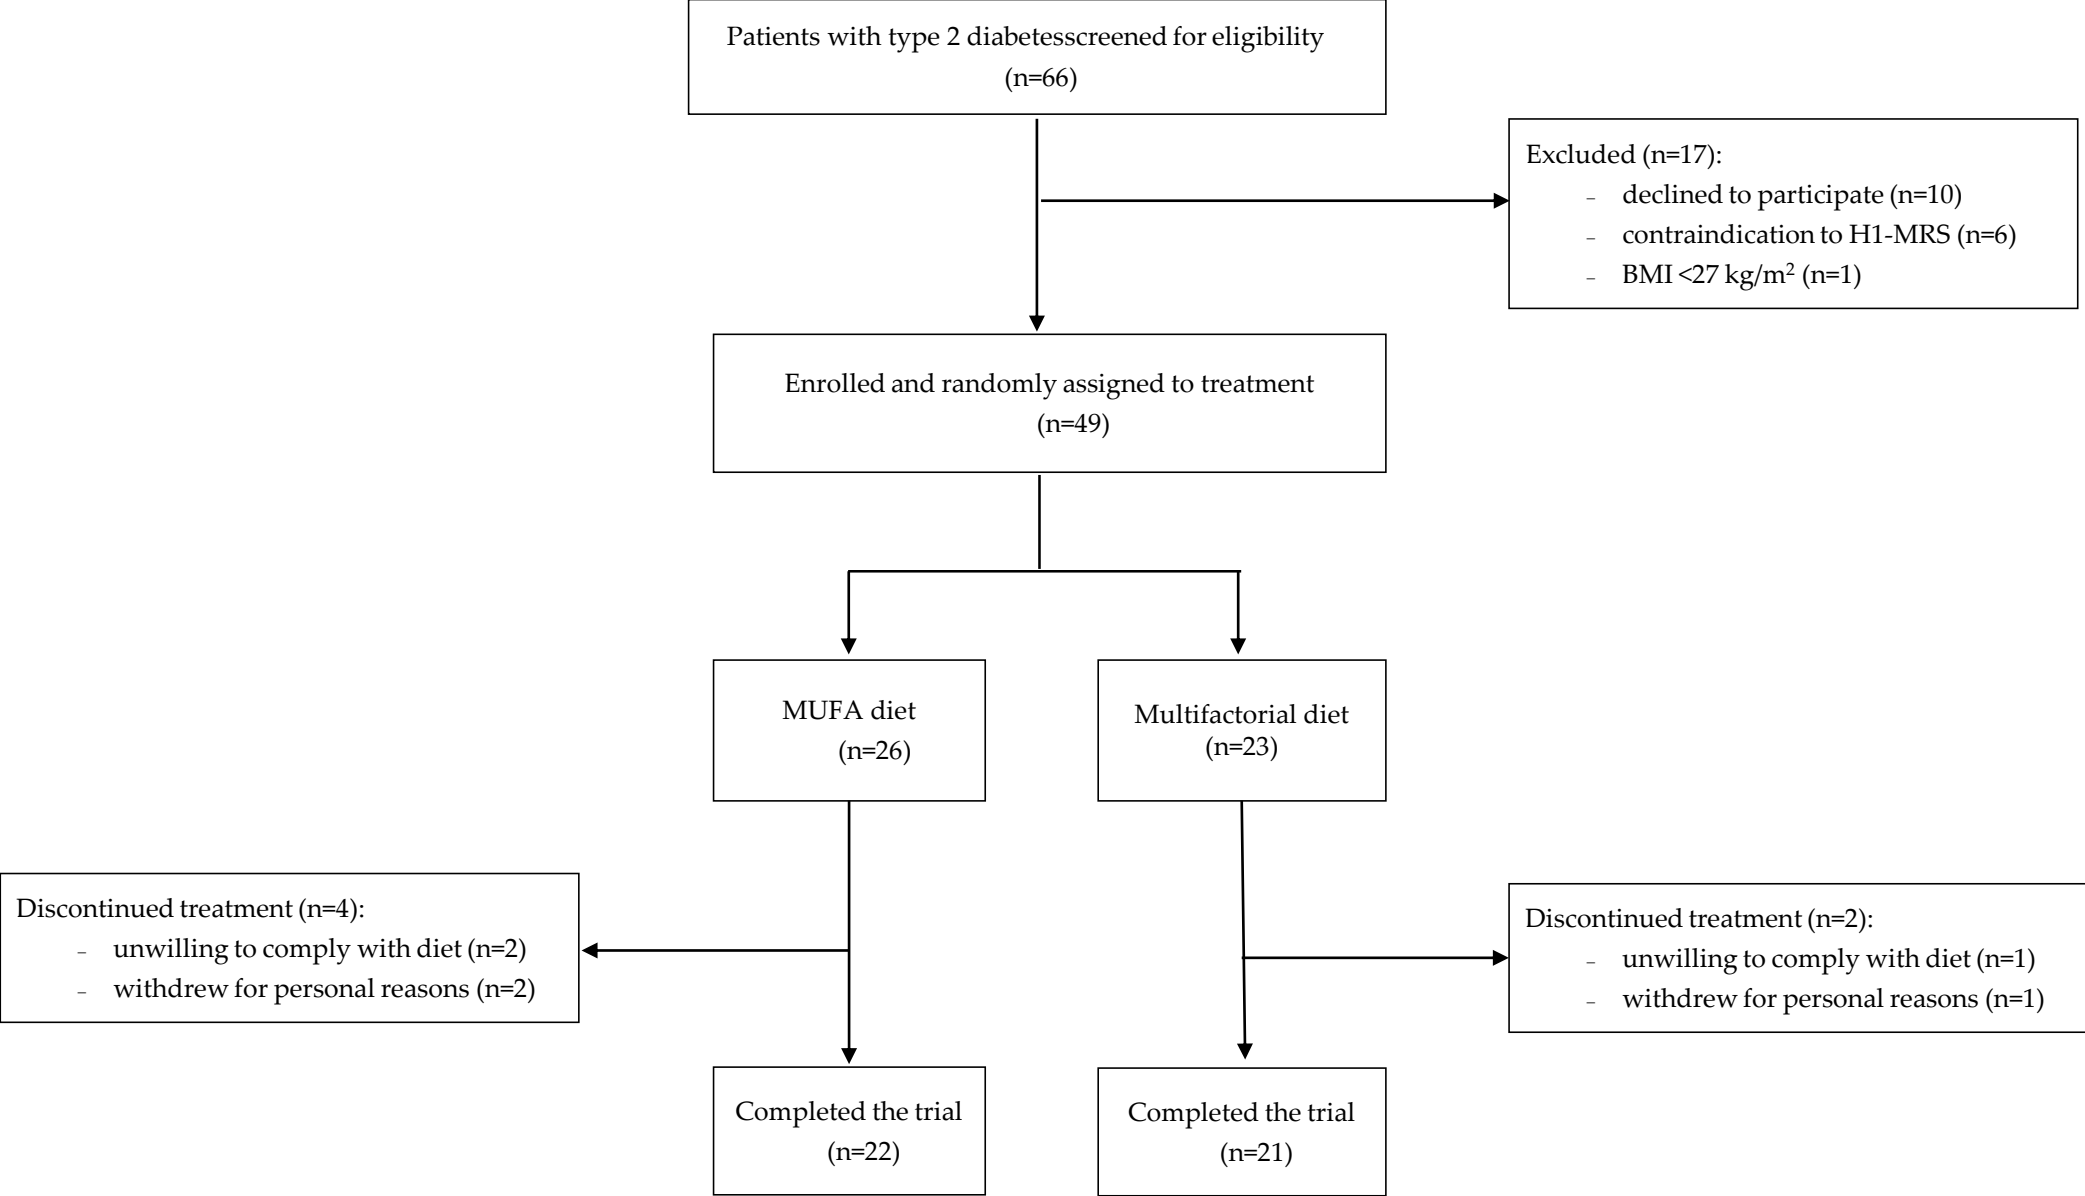

Supplement: s1 [file s1]
